# Supplementary material for: LC-MS/MS quantification of sulfotransferases is better than conventional immunogenic methods in determining human liver SULT activities: implication in precision medicine
Source: PubMed Central journal article supplement (PMC5478605; doi:10.1038/s41598-017-04202-w), 2017-06-20
Supplement: 41598_2017_4202_MOESM1_ESM.pdf [file 41598_2017_4202_MOESM1_ESM.pdf]

## **Supplementary Information For**

### **LC-MS/MS quantification of sulfotransferases is better than conventional immunogenic methods in determining human liver SULT activities: implication in precision medicine**

Cong Xie<sup>1, 2#</sup>, Tong-meng Yan<sup>2, 5#</sup>, Jia-mei Chen<sup>2</sup>, Xiao-yan Li<sup>2</sup>, Juan Zou<sup>2</sup>, Li-jun Zhu<sup>2</sup>, Linlin Lu<sup>2</sup>, Ying Wang<sup>2</sup>, Fu-yuan Zhou<sup>3, 2\*</sup>, Zhong-qiu Liu<sup>1, 2\*</sup>, Ming Hu<sup>4\*</sup>

<sup>1</sup>Department of Pharmaceutics, School of Pharmaceutical Sciences, Southern Medical University, Guangzhou, Guangdong, China, 510515.

<sup>2</sup>International Institute for Translational Chinese Medicine, Guangzhou University of Chinese Medicine, Guangzhou, Guangdong, China, 510006.

<sup>3</sup>Department of Infectious Diseases, Nanfang Hospital, Southern Medical University, Guangzhou, Guangdong, China, 510515.

<sup>4</sup>Department of Pharmacological and Pharmaceutical Sciences, College of Pharmacy, University of Houston, Houston, TX 77030, USA.

<sup>5</sup>State Key Laboratory of Quality Research in Chinese Medicine, Macau University of Science and Technology, Macau (SAR), China.

#### **Table of Contents:**

Table S1. Characteristics of peptides for quantification of SULTs

Table S2. MRM transitions of peptides for quantifying SULTs enzymes

Table S3. Incubation Conditions for SULT Activity Assays

Table S4. Analytical Parameters for Activity Assays of SULTs

Table S5. PCR Primers for Human SULT Enzymes and GADPH

Table S6. Protein expression levels of SULT enzymes in human liver S9 fraction

Table S7. Intra-and inter-day precision and accuracy for the determination of SULTs

Table S8. Extraction recovery of signature peptides for quantifying SULTs enzymes

Table S9. Validation for LC-MS/MS quantification of protein amount of SULTs using standard addition method

### **Figure of Contents:**

Fig. S1. The procedure of selecting the unique peptides for the MRM

UHPLC-MS/MS.

Fig. S2. The peptide of the MS/MS spectra of SULT1A1, SULT1A3, SULT1B1,

SULT1E1 and SULT2A1, in respectively, obtained from ESI-MS in positive.

ionization mode.

Fig. S3. The MS<sup>2</sup> spectrograms of prototypic peptides measured in the present study.

Fig. S4. Standard curves of prototypic peptides for quantifying SULT enzymes.

Fig. S5. Western blot analysis the protein expression levels of 5 SULTs enzymes in

healthy human liver S9 from 10 individual donors.

**Table S1. Characteristics of peptides for quantification of SULTs enzymes.**

| Isoforms | Sequence                                        | Length<br>(AA) | Mass (Da) | Unipro<br>Entry |
|----------|-------------------------------------------------|----------------|-----------|-----------------|
| SULT1B1  | V <sub>168</sub> AYGSWFTHVK <sub>178</sub>      | 11             | 1293.65   | O43704          |
| SULT1E1  | L <sub>39</sub> IHFLEK <sub>45</sub>            | 7              | 926.53    | Q53X91          |
| SULT2A1  | W <sub>34</sub> IQSVPIWER <sub>44</sub>         | 10             | 1304.69   | A8K015          |
| SULT1A2  | V <sub>148</sub> YHPGTWESFLEK <sub>161</sub>    | 14             | 1688.82   | E9PKR8          |
| SULT1A1  | T <sub>107</sub> HLPLALLPQTLLDQK <sub>122</sub> | 16             | 1800.05   | H3BRY5          |
| SULT1A3  | A <sub>74</sub> HPEPGTWDSFLEK <sub>87</sub>     | 14             | 1612.75   | H3BPL6          |

**Table S2. MRM transitions of peptides for quantifying SULT enzymes.**

| Isoforms | Quantitative Ions |                         |                 | Qualitative Ions |                         |                 |
|----------|-------------------|-------------------------|-----------------|------------------|-------------------------|-----------------|
|          | MRM Transitions   | Ion Series <sup>a</sup> | CE <sup>b</sup> | MRM Transitions  | Ion Series <sup>a</sup> | CE <sup>b</sup> |
| SULT2A1  | 657.5>700.5       | y5                      | 16              | 657.5>1014.3     | y8                      | 20              |
|          | 657.5>272.3       | a2                      | 20              | 657.5>886.5      | y7                      | 20              |
| SULT1A1  | 601.1>471.6       | y5*                     | 8               | 601.1>859.8      | b8                      | 12              |
|          | 601.1>746.3       | b7                      | 16              |                  |                         |                 |
| SULT1A2  | 564.1>714.4       | y12                     | 8               | 564.1>263.0      | b2                      | 8               |
|          | 564.1>225.2       | a2                      | 20              | 564.1>666.2      | a11                     | 16              |
| SUT1A3   | 538.8>532.6       | b5                      | 4               | 538.8>290.0      | b2                      | 20              |
|          | 538.8>690.0       | b7                      | 8               | 538.8>738.8      | y6                      | 8               |
| SULT1B1  | 432.2>562.8       | y6                      | 8               | 432.2>158.7      | b3                      | 24              |
|          | 432.2>171         | b2                      | 12              |                  |                         |                 |
| SULT1E1  | 309.8>408.0       | y6                      | 12              | 309.8>175.1      | y1                      | 12              |
|          | 309.8>564.2       | y4                      | 12              |                  |                         |                 |
| Pep-IS   | 565.0>398.2       | y <sup>03</sup>         | 12              | 565.0>221.1      | b2                      | 26              |
|          | 565.0>795.4       | y7                      | 15              | 565.0>454.9      | y <sup>8+</sup>         | 22              |

<sup>a</sup>: The nomenclature, reported by Roepstorff <sup>1</sup> and Johnson <sup>2</sup> for fragment ions in mass spectrum of signature peptides was used.

<sup>b</sup>: CE: collision energy

**Table S3. Incubation conditions for SULT activity assays.**

| Isoform              | Probe Substrate       | Substrate Conc. <sup>a</sup><br>( $\mu$ M) | Substrate Range <sup>b</sup><br>( $\mu$ M) | Protein Conc.<br>(mg/ml) | Incubation Time<br>(min) | Metabolite                                 |
|----------------------|-----------------------|--------------------------------------------|--------------------------------------------|--------------------------|--------------------------|--------------------------------------------|
| SULT1A1              | p-Nitrophenol         | 1                                          | 0.125-40                                   | 0.25                     | 30                       | Potassium 4-nitrophenyl sulfate            |
| SULT1A3 <sup>#</sup> | Dopamine              | 0.625                                      | 0.25-300                                   | 0.5                      | 30                       | Dopamine 3-O-Sulfate                       |
| SULT1A3 <sup>#</sup> | Dopamine              | 0.625                                      | 0.25-300                                   | 0.5                      | 30                       | Dopamine 4-O-Sulfate                       |
| SULT1B1              | 2-Aminophenol         | 2.5                                        | 0.25-40                                    | 0.25                     | 30                       | 2-aminophenol sulfate                      |
| SULT1E1              | 17 $\beta$ -estradiol | 10                                         | 0.3125-40                                  | 0.25                     | 30                       | 17 $\beta$ -estradiol 3-sulfate            |
| SULT2A1              | DHEA <sup>c</sup>     | 1                                          | 0.125-20                                   | 0.25                     | 30                       | Dehydroisoandrosterone<br>3-sulfate sodium |

a: A specific concentration of substrate was used for determining SULT activity of each patient.

b: A range concentration of substrate was used for determining kinetic profile of SULT in human liver S9.

c: DHEA: Dehydroisoandrosterone

<sup>#</sup>: Dopamine was the probe substrate of the SULT1A3. Dopamine has two isomeric metabolites in phase II

**Table S4. Analytical parameters for activity assays of SULTs.**

| Parameters (LC-MS/MS)       | SULT1A1                                                                  | SULT1A3                                                                    | SULT1B1                                                                | SULT1E1                                                                  | SULT2A1                                                                  |
|-----------------------------|--------------------------------------------------------------------------|----------------------------------------------------------------------------|------------------------------------------------------------------------|--------------------------------------------------------------------------|--------------------------------------------------------------------------|
| Analyte                     | p-Nitrophenol                                                            | Dopamine                                                                   | 2-Aminophenol                                                          | 17 $\beta$ -estradiol                                                    | DHEA <sup>b</sup>                                                        |
| Injection volume( $\mu$ l)  | 1                                                                        | 1                                                                          | 1                                                                      | 1                                                                        | 1                                                                        |
| Mobile phase(A/B)           | Ammonium acetate<br>/ACN <sup>a</sup>                                    | Ammonium acetate<br>/ACN                                                   | Ammonium acetate<br>/ACN                                               | Ammonium acetate<br>/ACN                                                 | Ammonium acetate<br>/ACN                                                 |
| Gradient program (%B(min))  | 20(0) $\rightarrow$ 45(2) $\rightarrow$ 45(6)<br>$\rightarrow$ 20(6.1-7) | 5(0-2) $\rightarrow$ 70(3.9) $\rightarrow$ 70(7)<br>$\rightarrow$ 5(7.1-8) | 5(0) $\rightarrow$ 45(2) $\rightarrow$ 45(5) $\rightarrow$<br>5(5.1-6) | 20(0) $\rightarrow$ 45(2) $\rightarrow$<br>45(4) $\rightarrow$ 20(4.1-5) | 20(0) $\rightarrow$ 45(2) $\rightarrow$<br>45(4) $\rightarrow$ 20(4.1-5) |
| Analyte transition          | 217.97>138                                                               | 231.8>151.90                                                               | 188>108                                                                | 351.10>271.20                                                            | 367.10>97                                                                |
| Collision energy(V)         | 8                                                                        | 20                                                                         | 20                                                                     | 32                                                                       | 48                                                                       |
| Cell accelerator voltage(V) | 4                                                                        | 5                                                                          | 2                                                                      | 5                                                                        | 4                                                                        |
| Retention time (min)        | 3.851                                                                    | 2.330 <sup>#</sup><br>2.720 <sup>#</sup>                                   | 1.543                                                                  | 2.443                                                                    | 2.637                                                                    |
| Internal standard           | PS <sup>c</sup>                                                          | PS                                                                         | PS                                                                     | PS                                                                       | PS                                                                       |

a:ACN:acetonitrile. #: The retention time 2.330 is the dopamine-4-O-Sulfate and the 2.720 is the dopamine-3-O-Sulfate.

b: DHEA: Dehydroepiandrosterone c: pregnenolone sulfate

**Table S5. PCR primers for human SULT enzymes and GAPDH.**

---

|         |         |                             |
|---------|---------|-----------------------------|
| GAPDH   | forward | GGCCTCCAAGGAGTAAGACC        |
|         | reverse | AGGGGAGATTCAGTGTGGTG        |
| SULT1A1 | forward | AAAGCCCCAGGGATTCCCTCA       |
|         | reverse | GGAAACTGCCACATCCTTTGCGT     |
| SULT1A3 | forward | CGATGCGGACTATGCGGAGAAG      |
|         | reverse | GACATGAGCCACTGTGCCTGAC      |
| SULT1B1 | forward | GCTGGTGACTGGAAGAATTACT      |
|         | reverse | GAAGAGCCTGTGGTTACATTGT      |
| SULT1E1 | forward | GGCTGGTCATCCAAATCCTGG       |
|         | reverse | AGGAACCATAAGGAACCTGTCC      |
| SULT2A1 | forward | TCGTGATAAGGGATGAAGATGTAATAA |
|         | reverse | TGCATCAGGCAGAGAATCTCA       |

---



**Table S6 Protein expression levels of SULT enzymes in human liver S9 fraction.**

The expression of enzymes was determined in human liver S9 from 10 donors. Each value represents the mean  $\pm$  SD (n=10).

| Enzyme  | No. of Quantified Donor | Protein Amounts   |       |       |         | Relative Protein Expression Level        |      |      |         | Correlation ( <sup>a</sup> r <sup>2</sup> ) |
|---------|-------------------------|-------------------|-------|-------|---------|------------------------------------------|------|------|---------|---------------------------------------------|
|         |                         | Mean              | Max   | Min   | Max/Min | Mean                                     | Max  | Min  | Max/Min |                                             |
|         |                         | pmol/mg protein   |       |       |         | relative protein expression level/ GAPDH |      |      |         |                                             |
| SULT1A1 | 10                      | 23.65 $\pm$ 12.93 | 48.54 | 12.14 | 4.0     | 0.55 $\pm$ 0.31                          | 1.06 | 0.24 | 4.4     | 0.899 <sup>b</sup>                          |
| SULT1A3 | 10                      | 5.18 $\pm$ 2.04   | 8.79  | 2.2   | 4.0     | 0.33 $\pm$ 0.07                          | 0.44 | 0.24 | 1.8     | 0.492                                       |
| SULT1B1 | 10                      | 5.39 $\pm$ 2.22   | 8.82  | 1.81  | 4.9     | 0.21 $\pm$ 0.05                          | 0.29 | 0.14 | 2.1     | 0.764 <sup>b</sup>                          |
| SULT1E1 | 10                      | 2.39 $\pm$ 0.94   | 4.19  | 1.51  | 2.8     | 0.49 $\pm$ 0.16                          | 0.65 | 0.20 | 3.2     | 0.691 <sup>b</sup>                          |
| SULT2A1 | 10                      | 63.56 $\pm$ 19.89 | 90.99 | 31.12 | 3.0     | 0.46 $\pm$ 0.13                          | 0.69 | 0.28 | 2.5     | 0.546                                       |

Max: maximum, Min: minimum, we used the isotope label-free LC-MS/MS to quantify protein amounts of the SULTs. And we used the western blot analysis to semi-quantify the relative protein expression levels of the same SULTs in the human liver S9 prepared from the 10 donor.

a r<sup>2</sup>: Pearson or Spearman correlation coefficient

b: Statistical significance of association ( $P < 0.05$ )

**Table S7. Table 4 Intra-and inter-day precision and accuracy for the determination of SULTs**

| Isoforms | LLOQ (nM) | Accuracy (%Deviation) |     |      | Intra-day Precision(%RSD) |       |       | Inter-day Precision(%RSD) |       |      |
|----------|-----------|-----------------------|-----|------|---------------------------|-------|-------|---------------------------|-------|------|
|          |           | Low                   | Mid | High | Low                       | Mid   | High  | Low                       | Mid   | High |
| SULT2A1  | 0.3       | 3.0                   | 5.7 | 6.7  | -4.5                      | -9.6  | -1.3  | -3.6                      | -13.9 | -3.8 |
| SULT1A1  | 0.4       | 6.0                   | 8.3 | 2.6  | -0.7                      | -7.4  | 1.1   | -1.2                      | -8.9  | -1.2 |
| SULT1A3  | 0.5       | 4.0                   | 5.4 | 5.4  | -10.8                     | 8.5   | -2.5  | -9.2                      | 9.6   | -7.0 |
| SULT1B1  | 0.8       | 12.5                  | 7.5 | 5.2  | -10.3                     | -16.2 | -11.0 | -18.1                     | -16.7 | -9.4 |
| SULT1E1  | 0.3       | 4.4                   | 3.5 | 2.6  | -11.5                     | -10.6 | 0.5   | -16.1                     | -11.0 | -1.2 |

Precision and accuracy were which for the determination of SULT isoforms. Intra- and Inter-Day precision and accuracy were determined by measuring standard samples at three concentration levels (Low, Mid, High): 1.56, 12.5, 100nM for all the signature peptides.

**Table S8: Extraction recovery of signature peptides for quantifying SULTs enzymes**

| Isoforms | Recovery (%) (mean $\pm$ SD, n=3) |                |                 |
|----------|-----------------------------------|----------------|-----------------|
|          | Low                               | Mid            | High            |
| SULT2A1  | 106.2 $\pm$ 20.3                  | 84.3 $\pm$ 5.1 | 87.8 $\pm$ 4.3  |
| SULT1A1  | 109.7 $\pm$ 6.1                   | 92.5 $\pm$ 3.9 | 107.3 $\pm$ 1.5 |
| SULT1A3  | 97.9 $\pm$ 6.3                    | 79.7 $\pm$ 6.6 | 80.9 $\pm$ 8.5  |
| SULT1B1  | 80.2 $\pm$ 10.5                   | 81.2 $\pm$ 1.8 | 88.7 $\pm$ 4.2  |
| SULT1E1  | 85.9 $\pm$ 4.8                    | 93.1 $\pm$ 5.0 | 98.6 $\pm$ 1.8  |

**Table S9: Validation for LC-MS/MS quantification of protein amount of SULTs using standard addition method**

| Isoforms | Amount in HLS9<br>(mean $\pm$ SD,n=4,pmol/sample) | Spiked amount of peptide<br>(pmol/mg) | Calculated amount of spiked peptide<br>(pmol/mg) | Inaccuray<br>(%Deviation) |
|----------|---------------------------------------------------|---------------------------------------|--------------------------------------------------|---------------------------|
| SULT2A1  | 23.6 $\pm$ 2.5                                    | 29.6                                  | 6.0                                              | 4%                        |
| SULT1A1  | 17.8 $\pm$ 1.0                                    | 24.1                                  | 6.3                                              | 2%                        |
| SULT1A3  | 5.9 $\pm$ 0.7                                     | 11.4                                  | 5.5                                              | 12%                       |
| SULT1B1  | 5.2 $\pm$ 0.2                                     | 10.7                                  | 5.6                                              | 11%                       |
| SULT1E1  | 0.9 $\pm$ 0.0                                     | 7.1                                   | 6.2                                              | 1%                        |

## Supplementary Figures

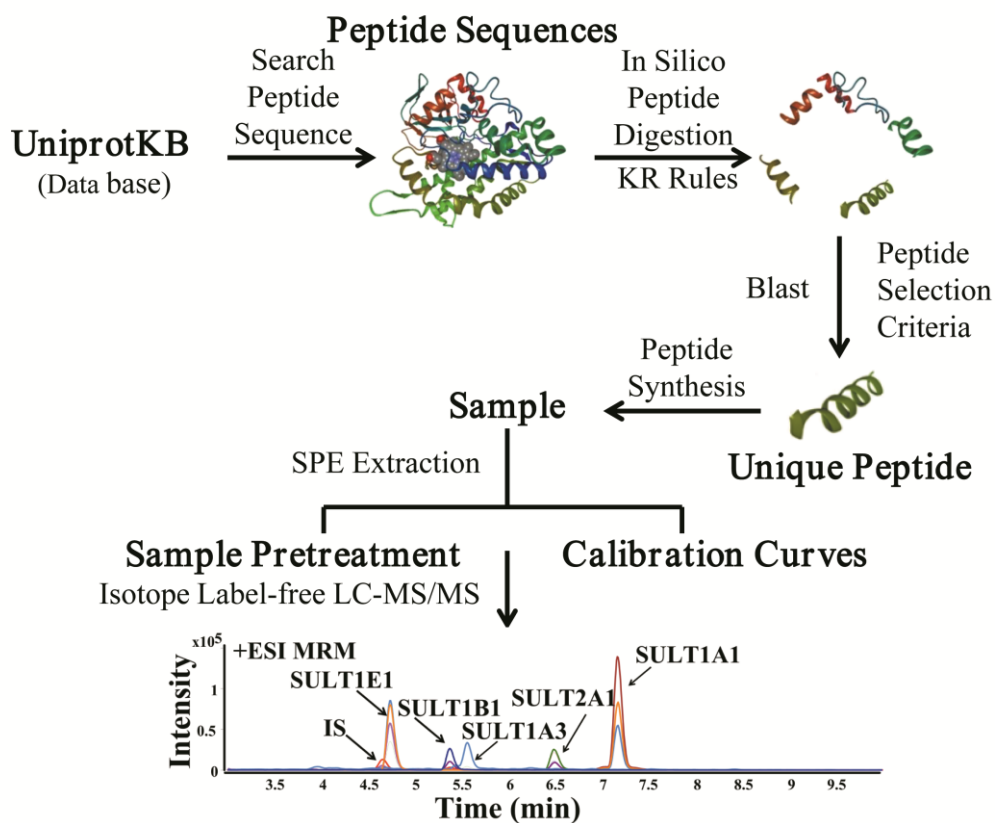

**Figure S1.** The full protein sequences for the SULT1A1, SULT1A2, SULT1A3, SULT1B1, SULT1E1 and SULT2A1 were obtained in batches from UniprotKB database and take them in the silico peptide digestion and excluded their' regions of uncertainty. The uniqueness of peptide sequences was verified by using BLAST search analysis. And, we developed the isotope label-free UHPLC-MS/MS for the quantification of SULTs in human liver S9.

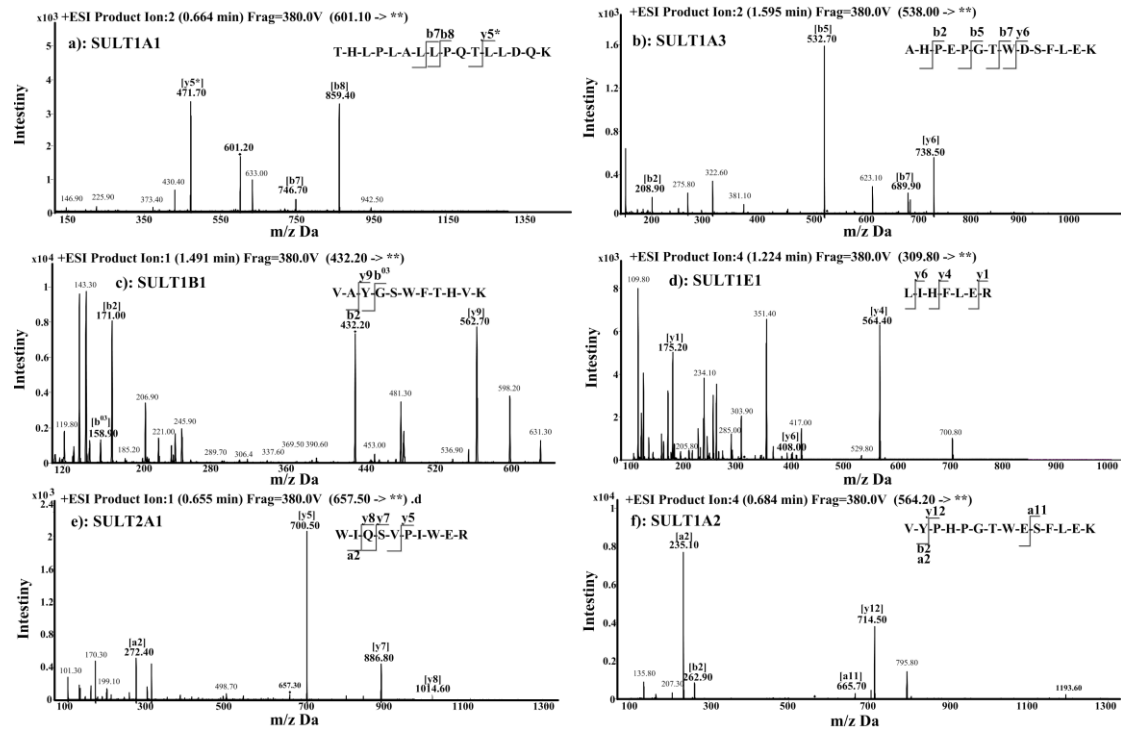

**Figure S2.** The peptide of the MS/MS spectra of m/z 601.1, +3-charged THLPLALLPQTLLDQK, m/z 538.8, +3-charged AHPEPGTWDSFLEK, m/z 432.2, +3-charged VAYGSWFTHVK, m/z 309.8, +3-charged LIHFLEK, m/z 657.5, +2-charged WIQSVPIWER, m/z 564.1, +3-charged VYPHPGTWESFLEK, which were representative of the (a) SULT1A1, (b) SULT1A3, (c) SULT1B1, (d) SULT1E1, (e) SULT2A1, (f) SULT1A2 in respectively, obtained from ESI-MS in positive ionization mode. Arrows indicate optimum product ions for use in MRM transitions.

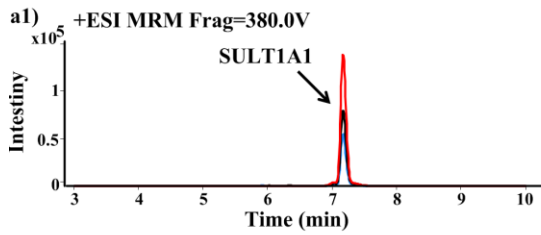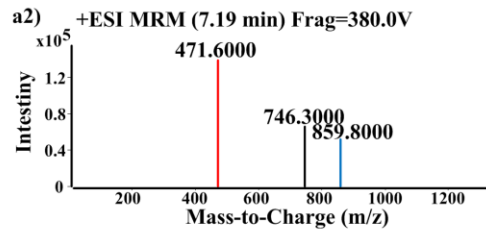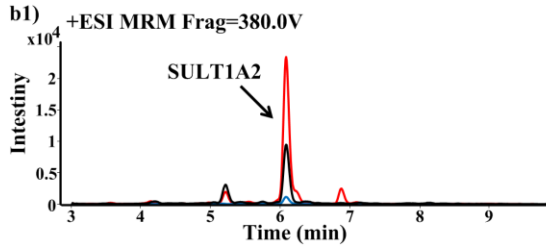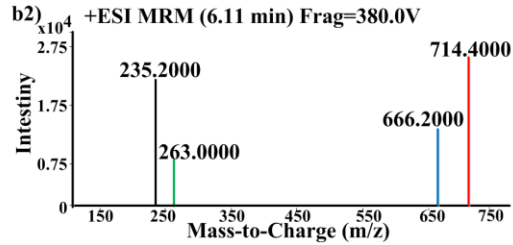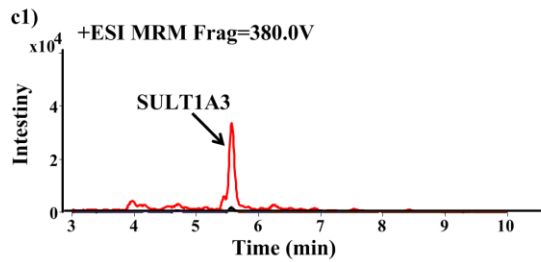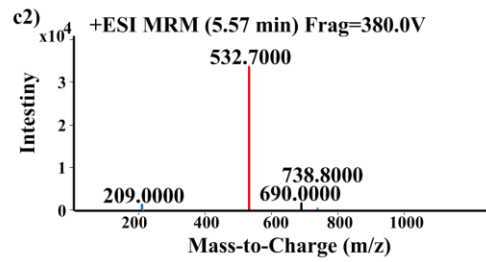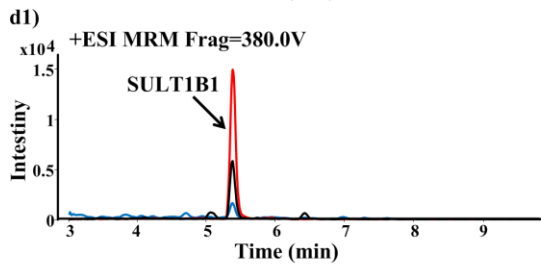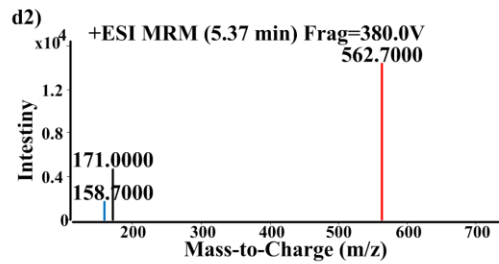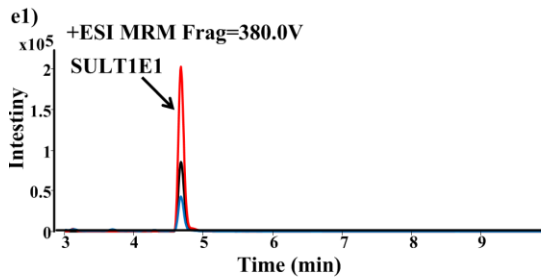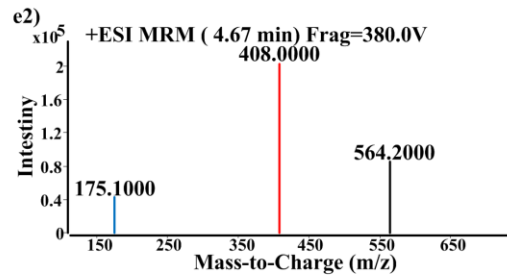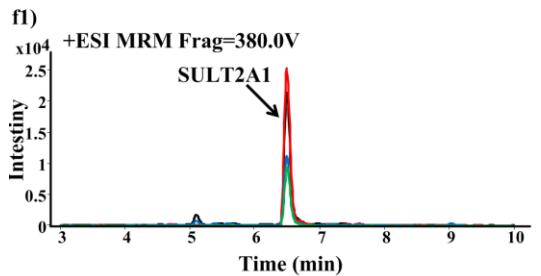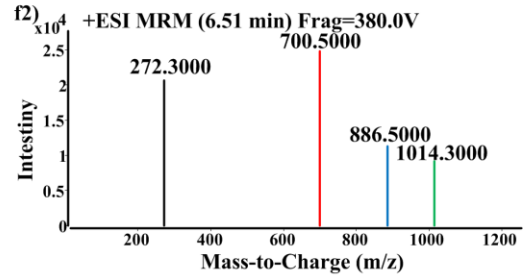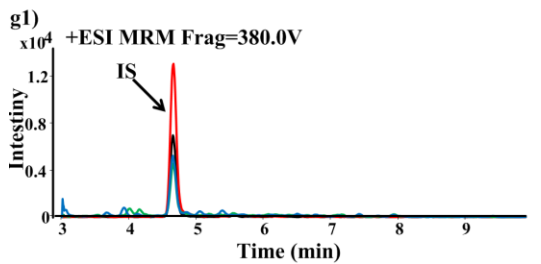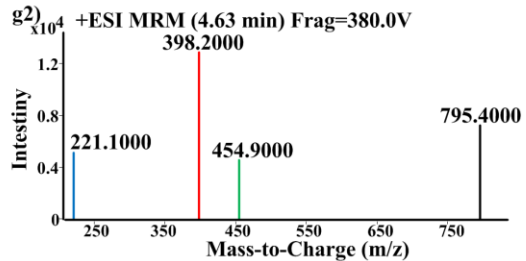

**Figure S3.** The a1-g1 showed that MRM chromatograms of SULT1A1, SULT1A2, SULT1A3, SULT1B1, SULT1E1, SULT2A1 and Internal Standard (IS). The a2-g2 showed that MS<sup>2</sup> spectrograms of prototypic peptides. The red bar graph was the highest sensitivity transition for the quantitative ion.



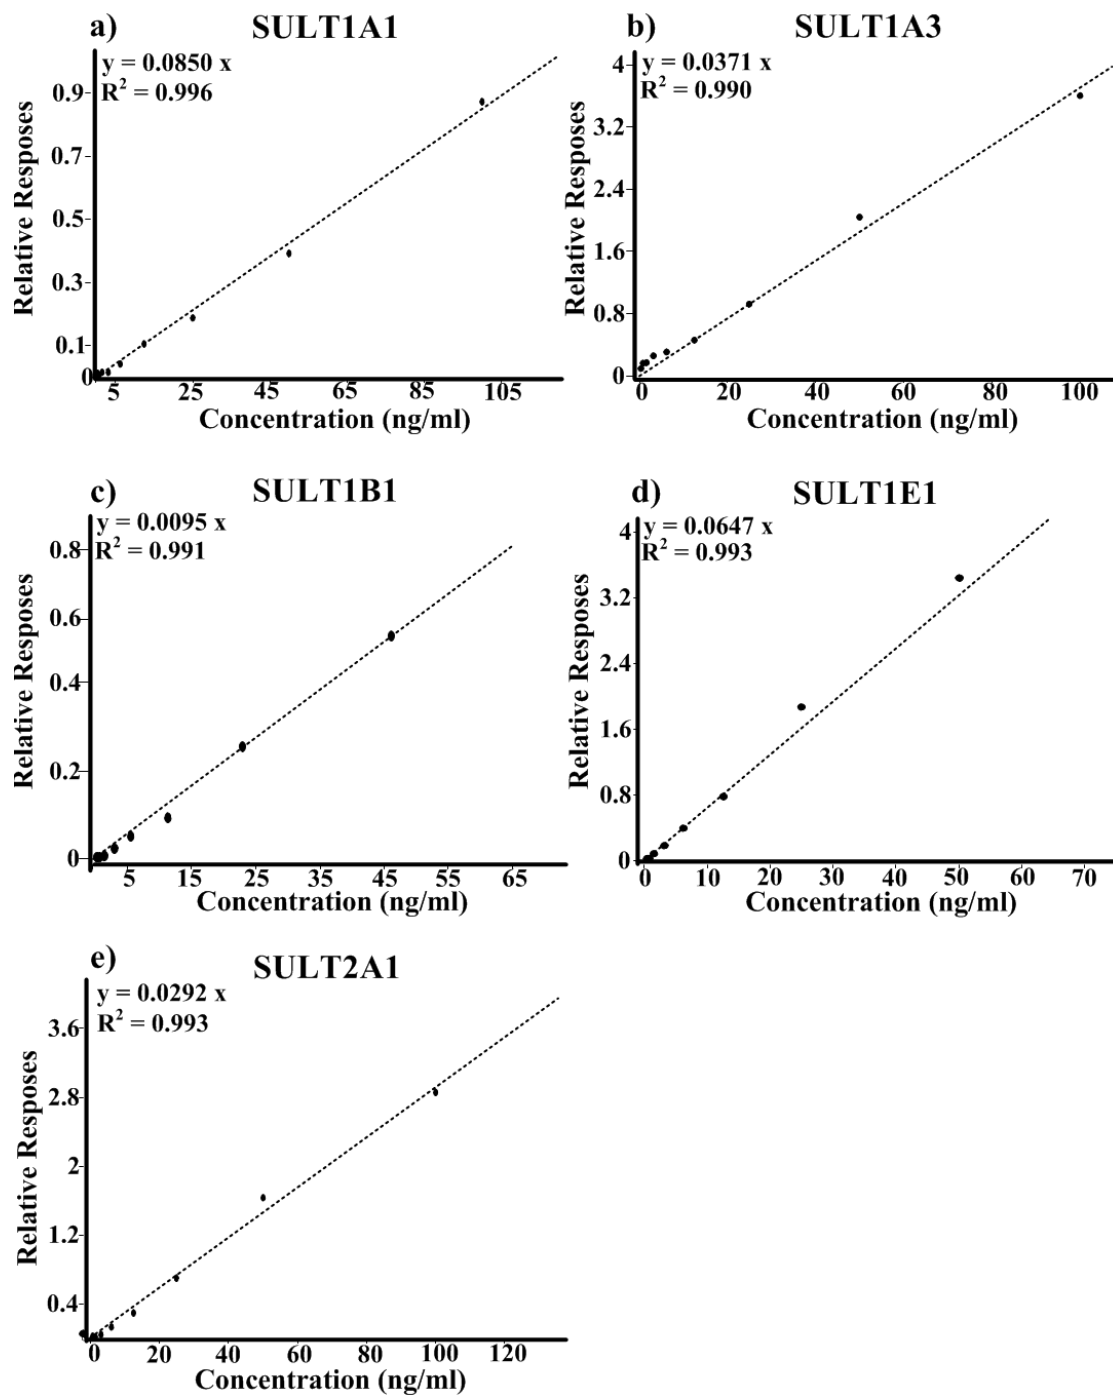

**Figure. S4.** Standard curves of prototypic peptides for quantifying SULT enzymes, which were representative of the (a) SULT1A1, (b) SULT1A3, (c) SULT1B1, (d) SULT1E1 and (e) SULT2A1, respectively.

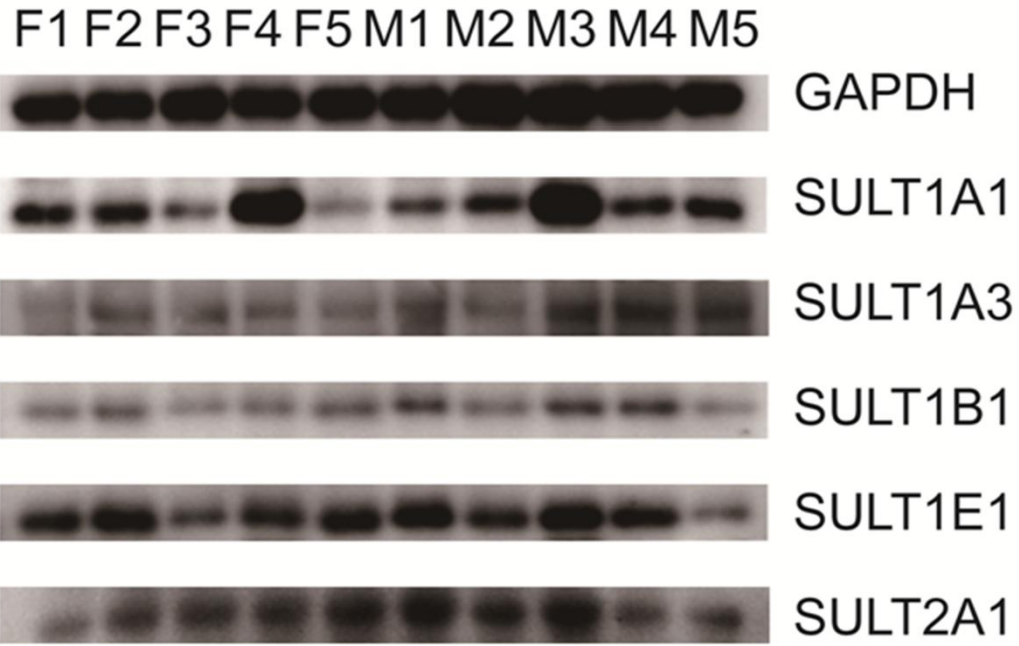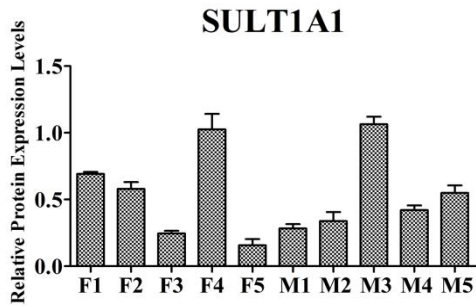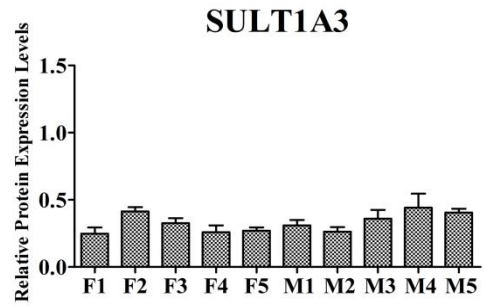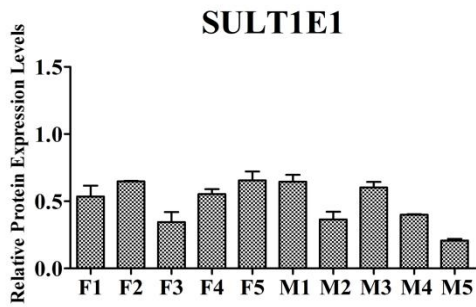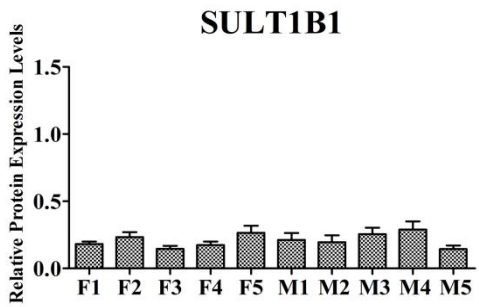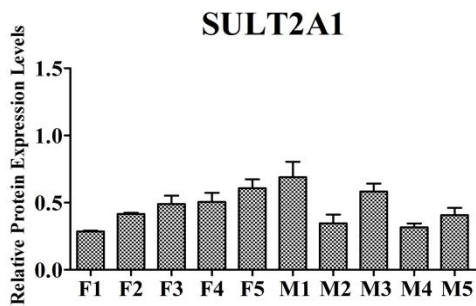

**Figure S5.** We used the Western blot analysis to semi-quantify the SULTs enzymes such as the SULT1A1, SULT2A1, SULT1B1, SULT1E1 and SULT1A3 in healthy human liver S9 from 10 individual donors. M: male. F: female. GAPDH was used for normalization.

## References

- 1 Roepstorff, P. & Fohlman, J. Proposal for a common nomenclature for sequence ions in mass spectra of peptides. *Biomedical mass spectrometry* **11**, 601, doi:10.1002/bms.1200111109 (1984).
- 2 Johnson, R. S., Martin, S. A., Biemann, K., Stults, J. T. & Watson, J. T. Novel fragmentation process of peptides by collision-induced decomposition in a tandem mass spectrometer: differentiation of leucine and isoleucine. *Analytical chemistry* **59**, 2621-2625 (1987).
